# Supplementary material for: Reconstructing the phylogeny of 21 completely sequenced arthropod species based on their motor proteins
Source: PubMed Central journal article supplement (PMC2674883; doi:10.1186/1471-2164-10-173), 2009-04-21

# Myosin

## Full Sequence

## Head Sequence

NJ / Gaps

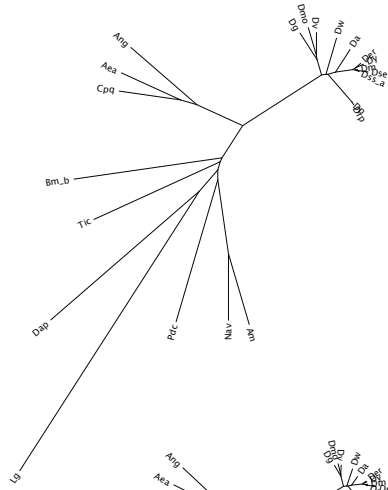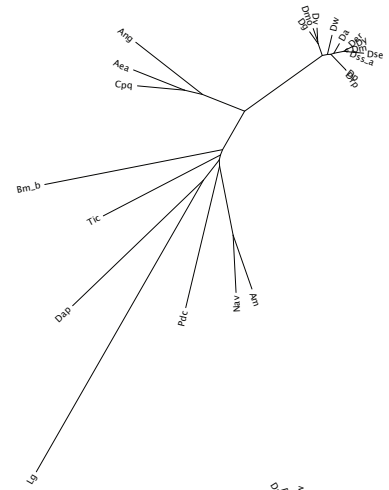

NJ / No Gaps

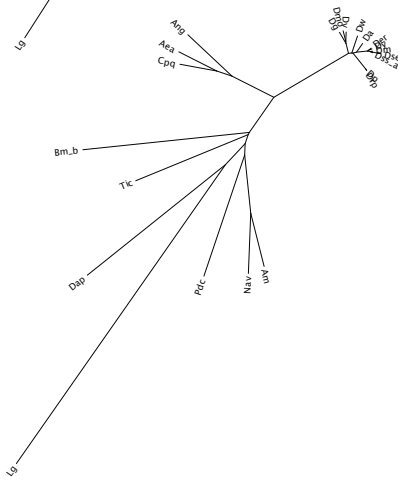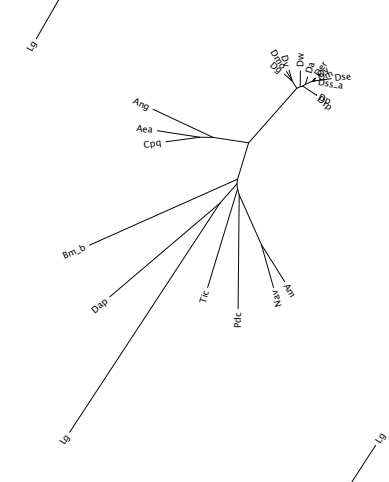

ML / Gaps

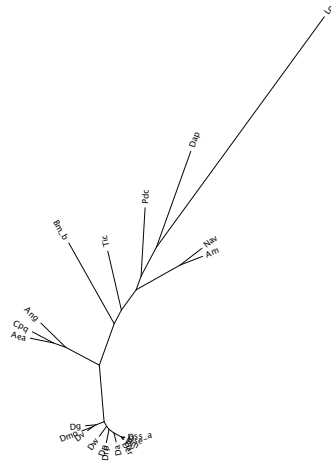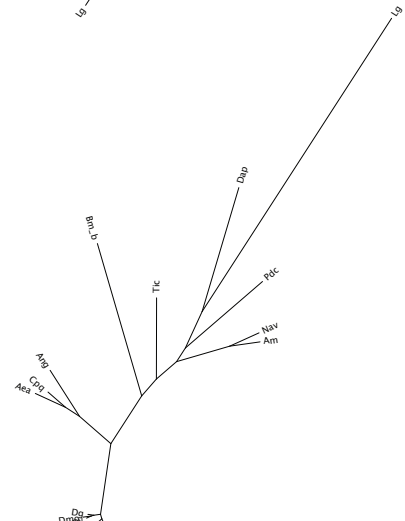

ML / No Gaps

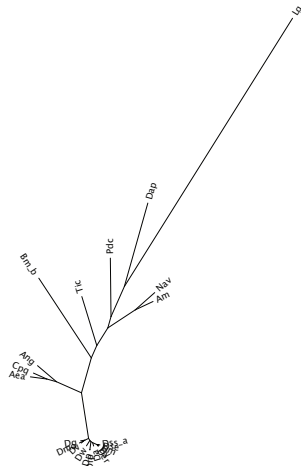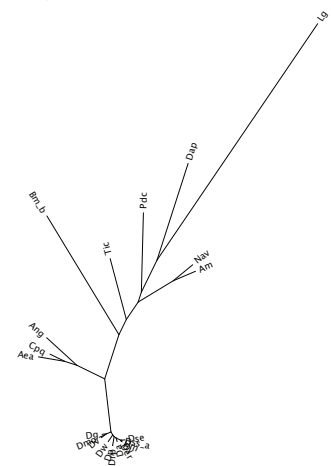



# Dynein

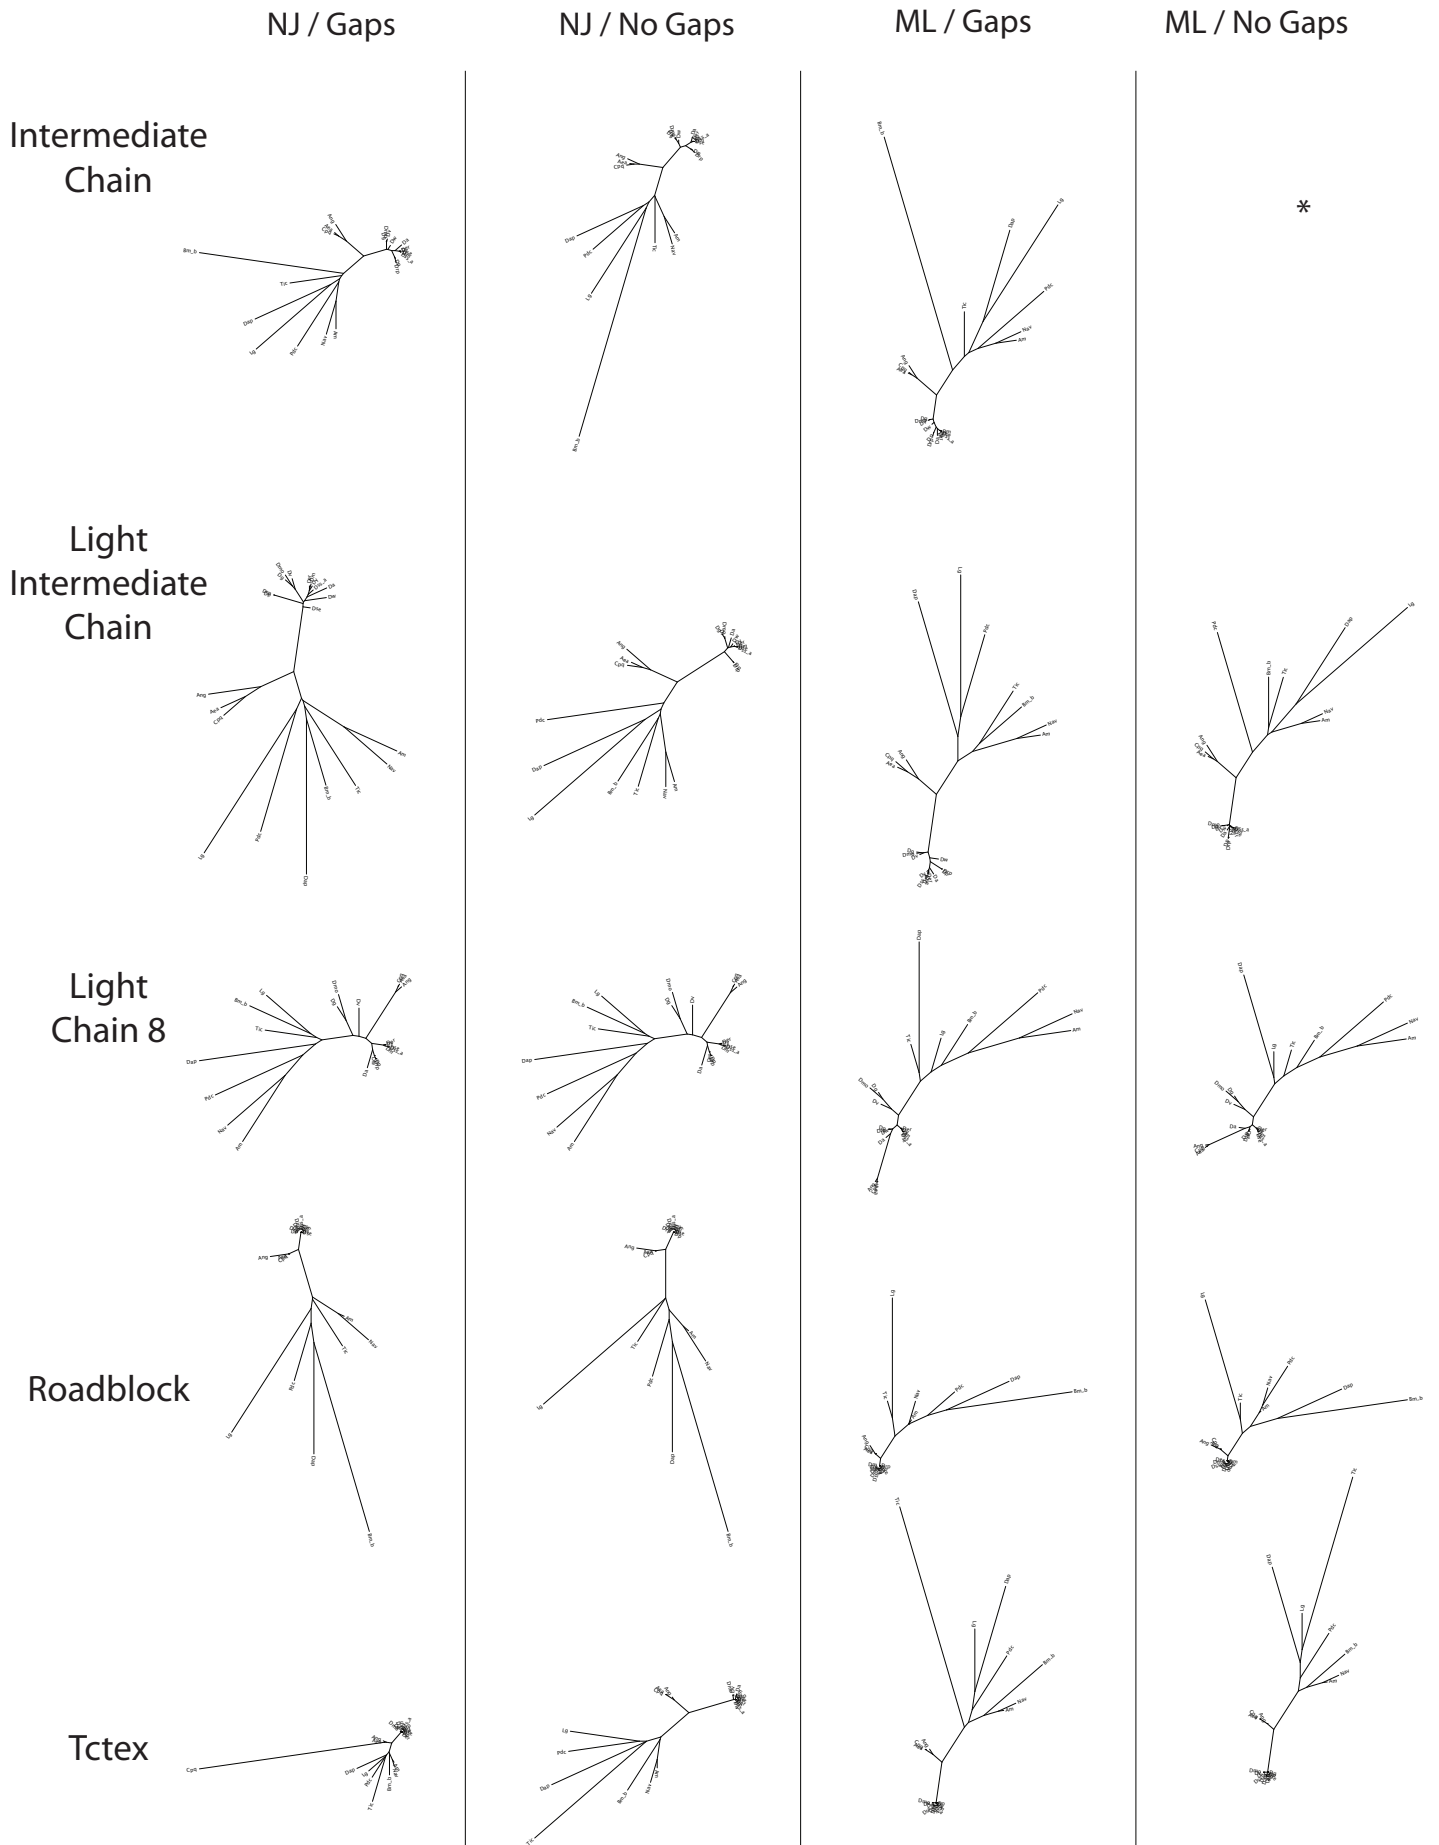



# Arp & Dynactin 1

NJ / Gaps

NJ / No Gaps

ML / Gaps

ML / No Gaps

Arp1

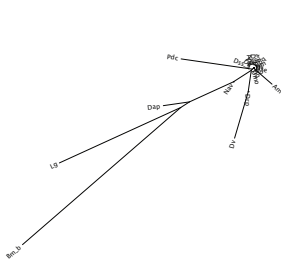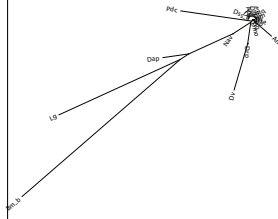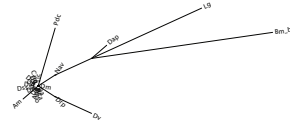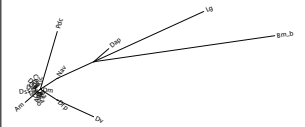

Arp11

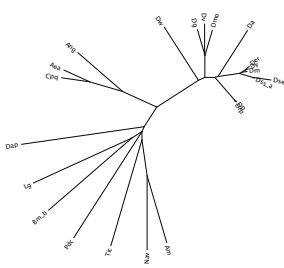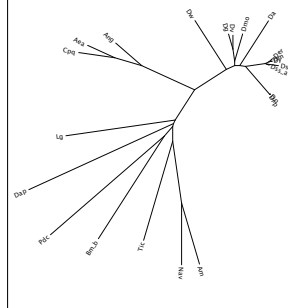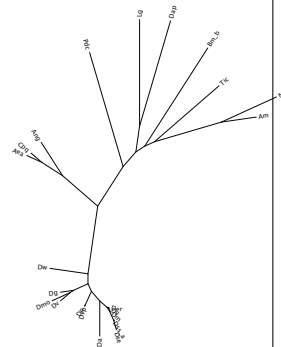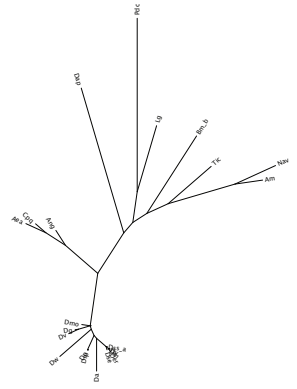

Dynactin1  
p150

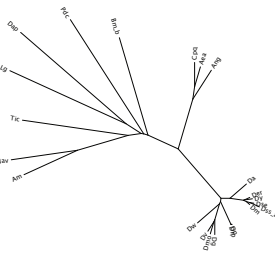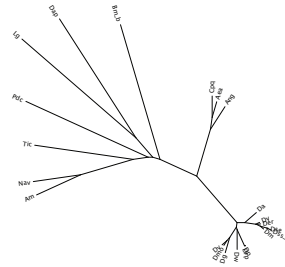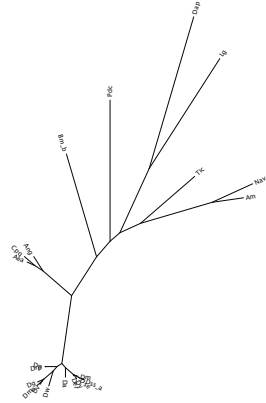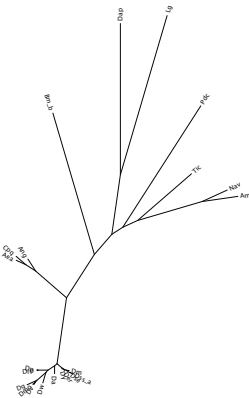

Dynactin2  
p50

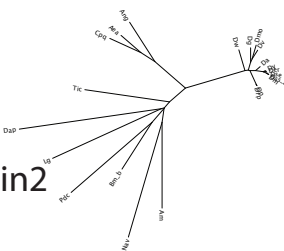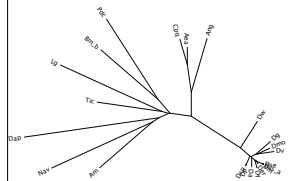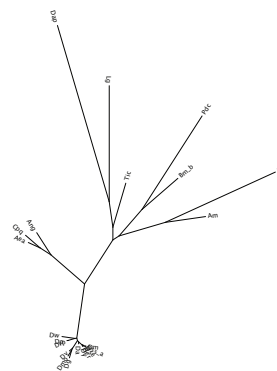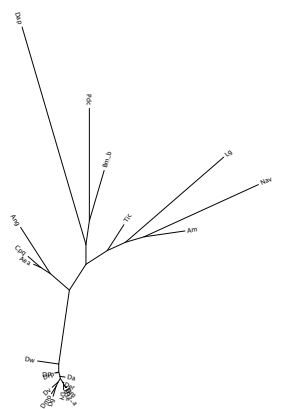

Supplement: 1471-2164-10-173-S1.pdf [file 1471-2164-10-173-S1.pdf]
