# Supplementary material for: Reconstructing the phylogeny of 21 completely sequenced arthropod species based on their motor proteins
Source: PubMed Central journal article supplement (PMC2674883; doi:10.1186/1471-2164-10-173), 2009-04-21

# Phylogenomics NJ Gaps

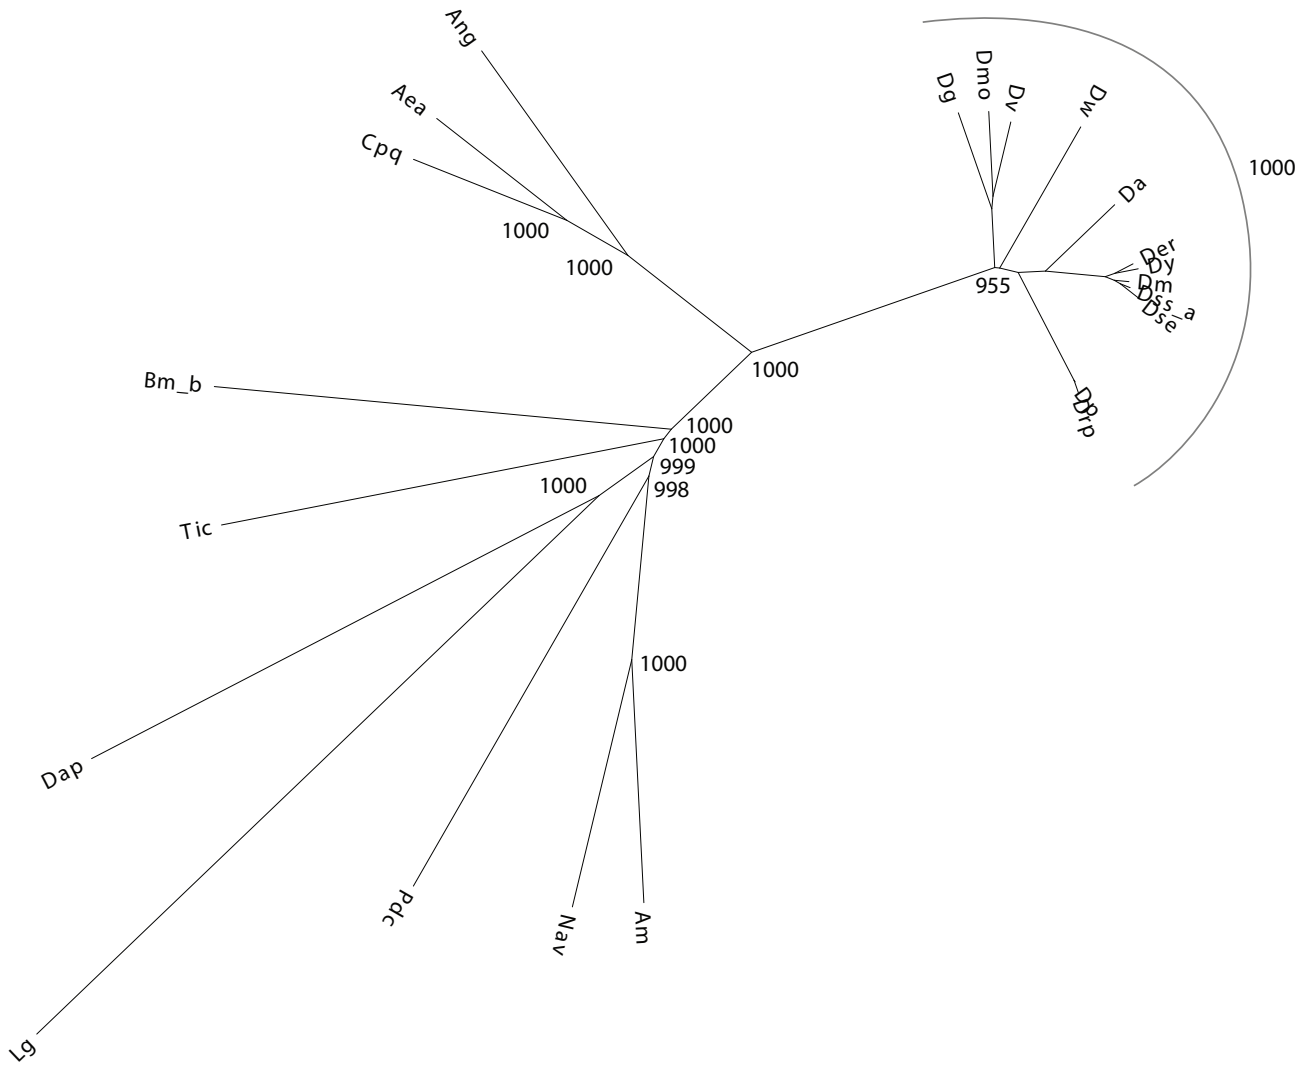

Supplement: 1471-2164-10-173-S2.pdf [file 1471-2164-10-173-S2.pdf]
